# Supplementary material
Source: PubMed Central journal article supplement (PMC3020987)

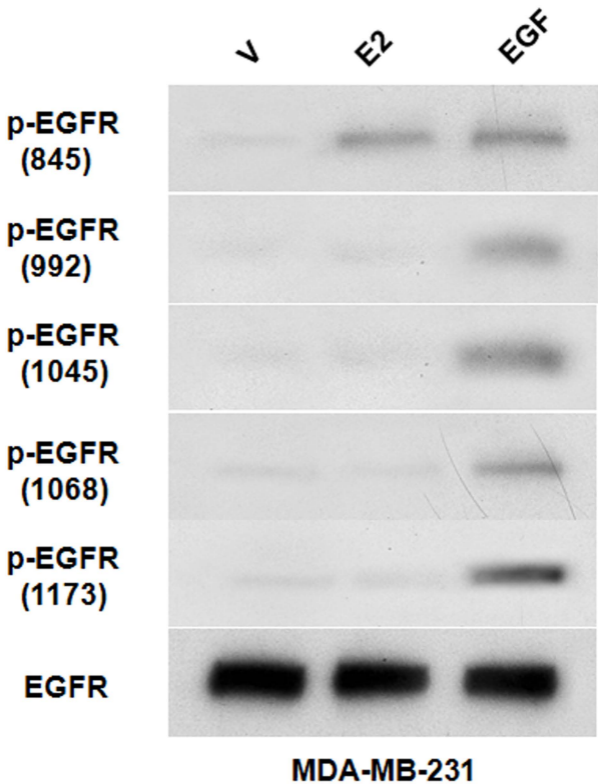

Supplemental Figure S3

Supplement: NIHMS233581-supplement-4.pdf [file NIHMS233581-supplement-4.pdf]
